# Supplementary material for: Elevated testicular apoptosis is associated with elevated sphingosine driven by gut microbiota in prediabetic sheep
Source: BMC Biol. 2022 May 24;20:121. doi: 10.1186/s12915-022-01326-y (PMC9128135; doi:10.1186/s12915-022-01326-y)

## Supporting Information

### Elevated testicular apoptosis is associated with elevated sphingosine driven by gut microbiota in prediabetic sheep

Yuanchao Sun<sup>1,2,#</sup>, Peng Sun<sup>1,3,#</sup>, Yanting Hu<sup>1,#</sup>, Liying Shan<sup>1,#</sup>, Qi Geng<sup>1</sup>, Yutian Gong<sup>1</sup>, Haitao Fan<sup>1</sup>, Teng Zhang<sup>1,\*</sup>, Yang Zhou<sup>1,\*</sup>

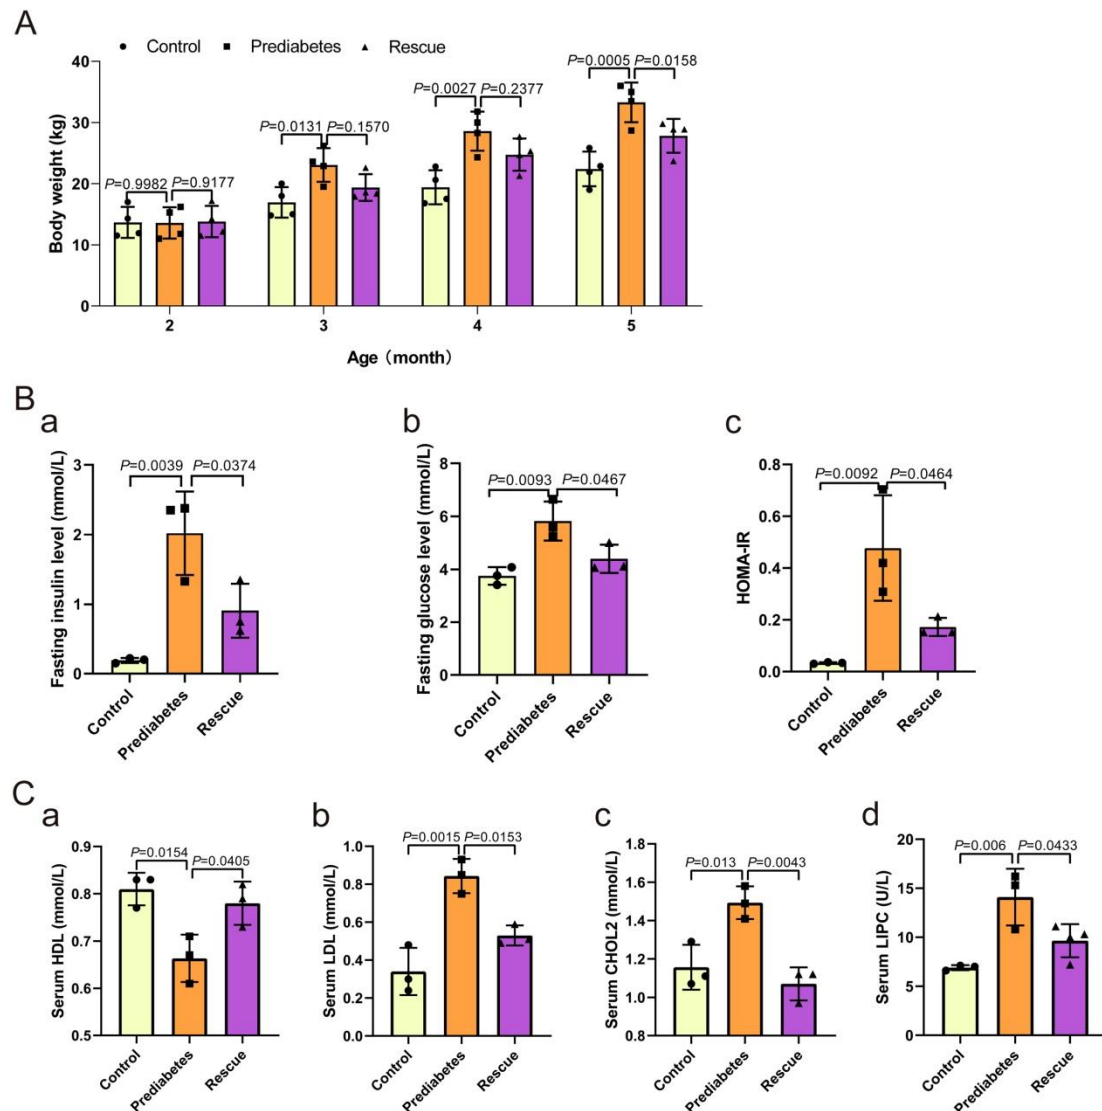

**Figure S1.** Physiological indicator alteration in the prediabetic sheep model. **A** Body weights for the three groups, with age ( $n=4$ ). **B** (a) Fasting insulin levels ( $n=3$ ), (b) fasting glucose levels ( $n=3$ ), and (c) HOMA-IR insulin resistance index ( $n=3$ ) in the control, prediabetes, and rescue groups. **C** Levels of (a) HDL ( $n=3$ ), (b) LDL ( $n=3$ ), (c) CHOL2 ( $n=3$ ), and (d) LIPC ( $n=3$ ) in sera of the three groups.

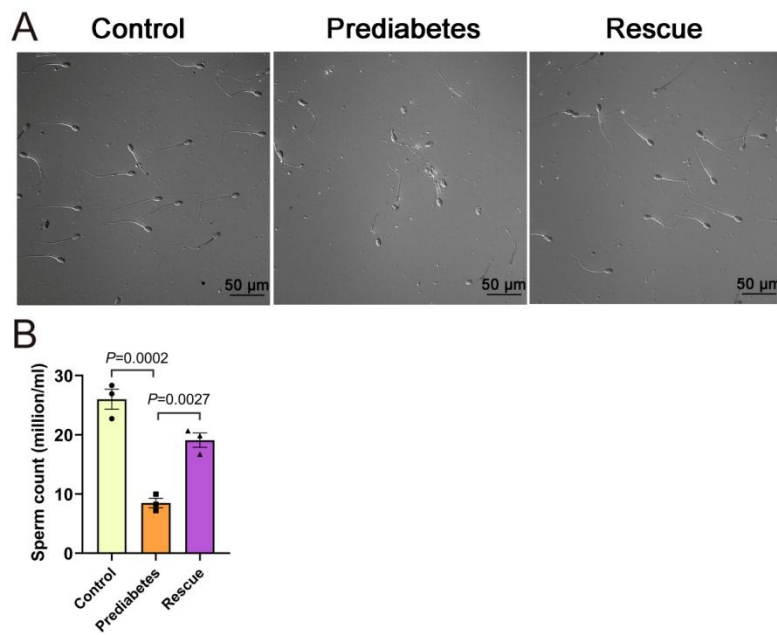

**Figure S2.** The sperm parameters. **A** The sperm smear of the spermatozoa morphology. Scale bar = 50  $\mu$ m. **B** Statistical analysis of sperm counts from three groups ( $n=3$ ).

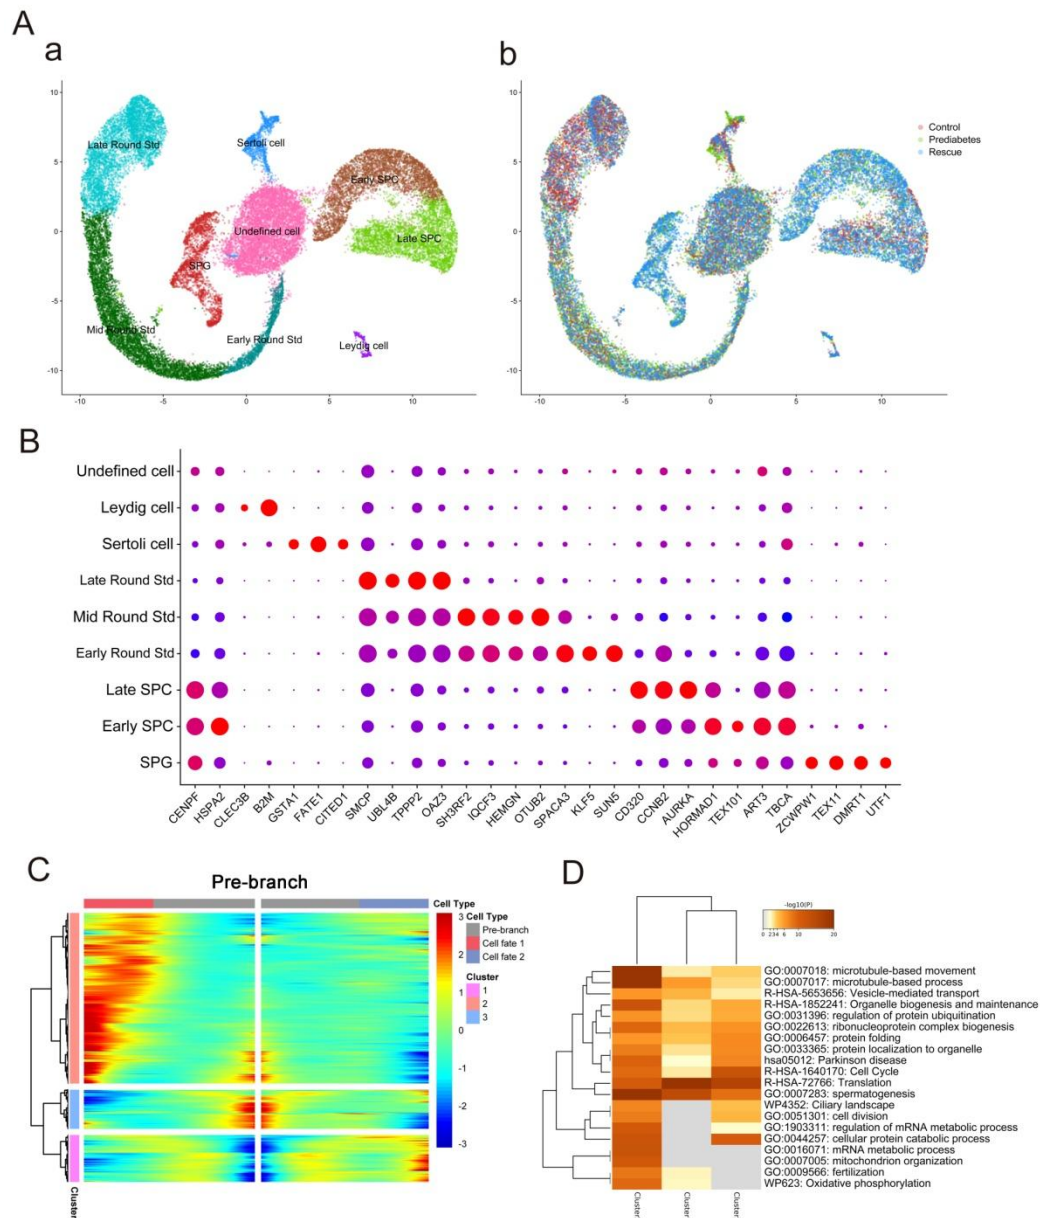

**Figure S3.** Cluster identification of sheep testicular cells. **A** (a) UMAP plot of testicular cells as defined by scRNA-seq analysis. (b) UMAP plot of three group testicular cells. **B** Dot plot of general special marker genes expressed in each cluster. **C** Heatmap represents significant DEGs between each cluster of Round Std arrest at branch point 1. **D** Gene Ontology (GO) terms of DEGs in three gene clusters.

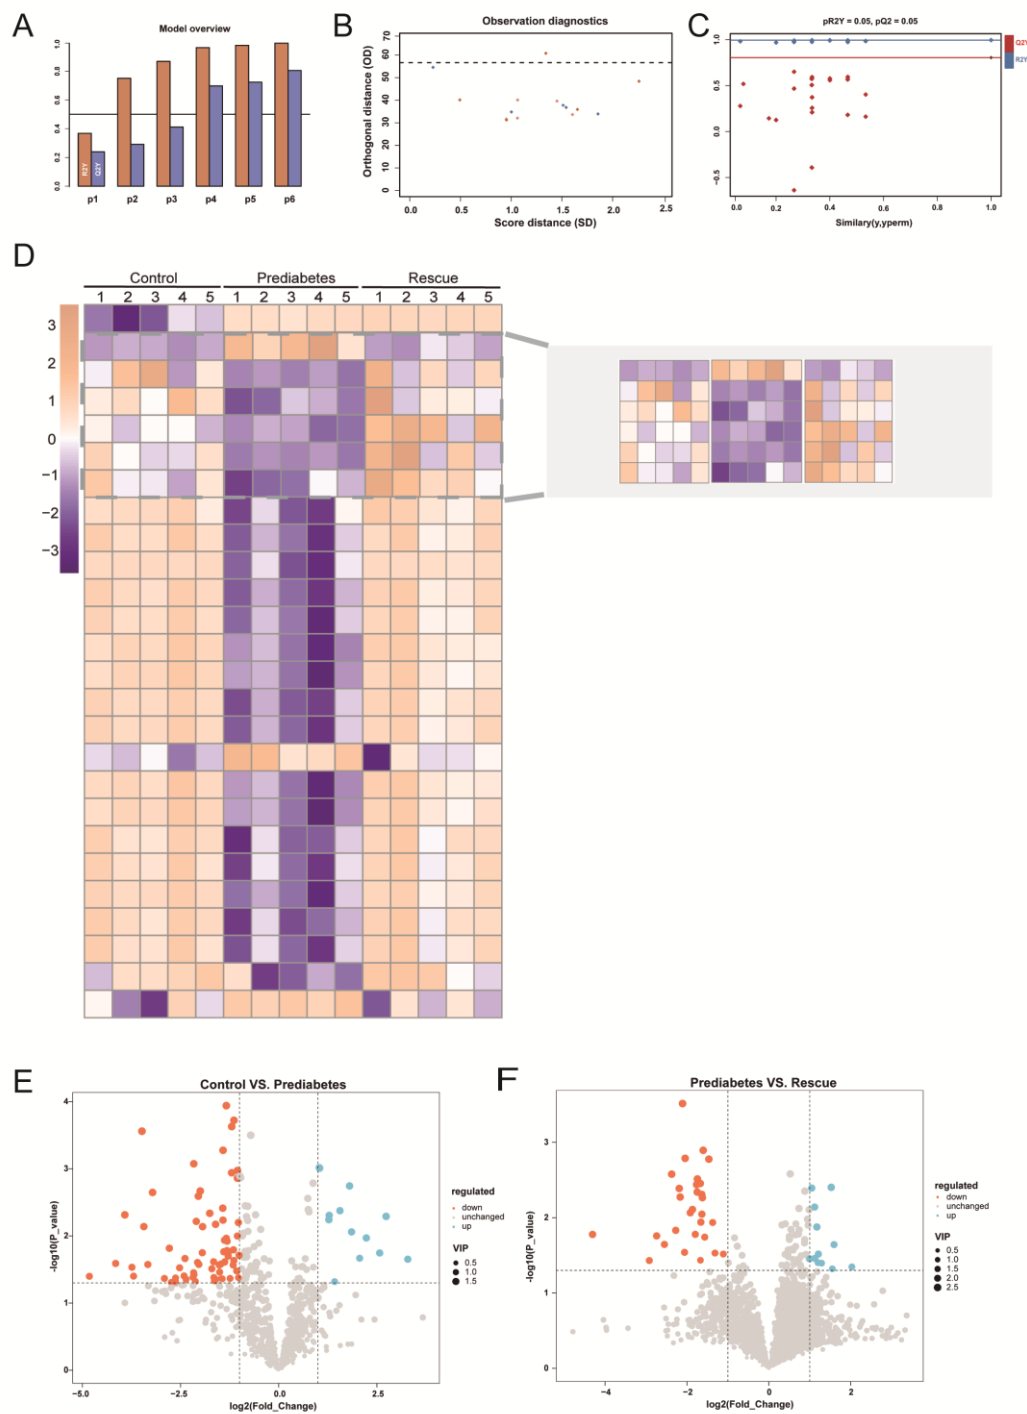

**Figure S4.** Metabolomics profiling. **A-C** PLS-DA validation diagram. **D** Heatmaps of general differential metabolites. **E-F** Volcano plots of general differential metabolites in control vs. prediabetes groups and prediabetes vs. rescue groups ( $n=5$ ).

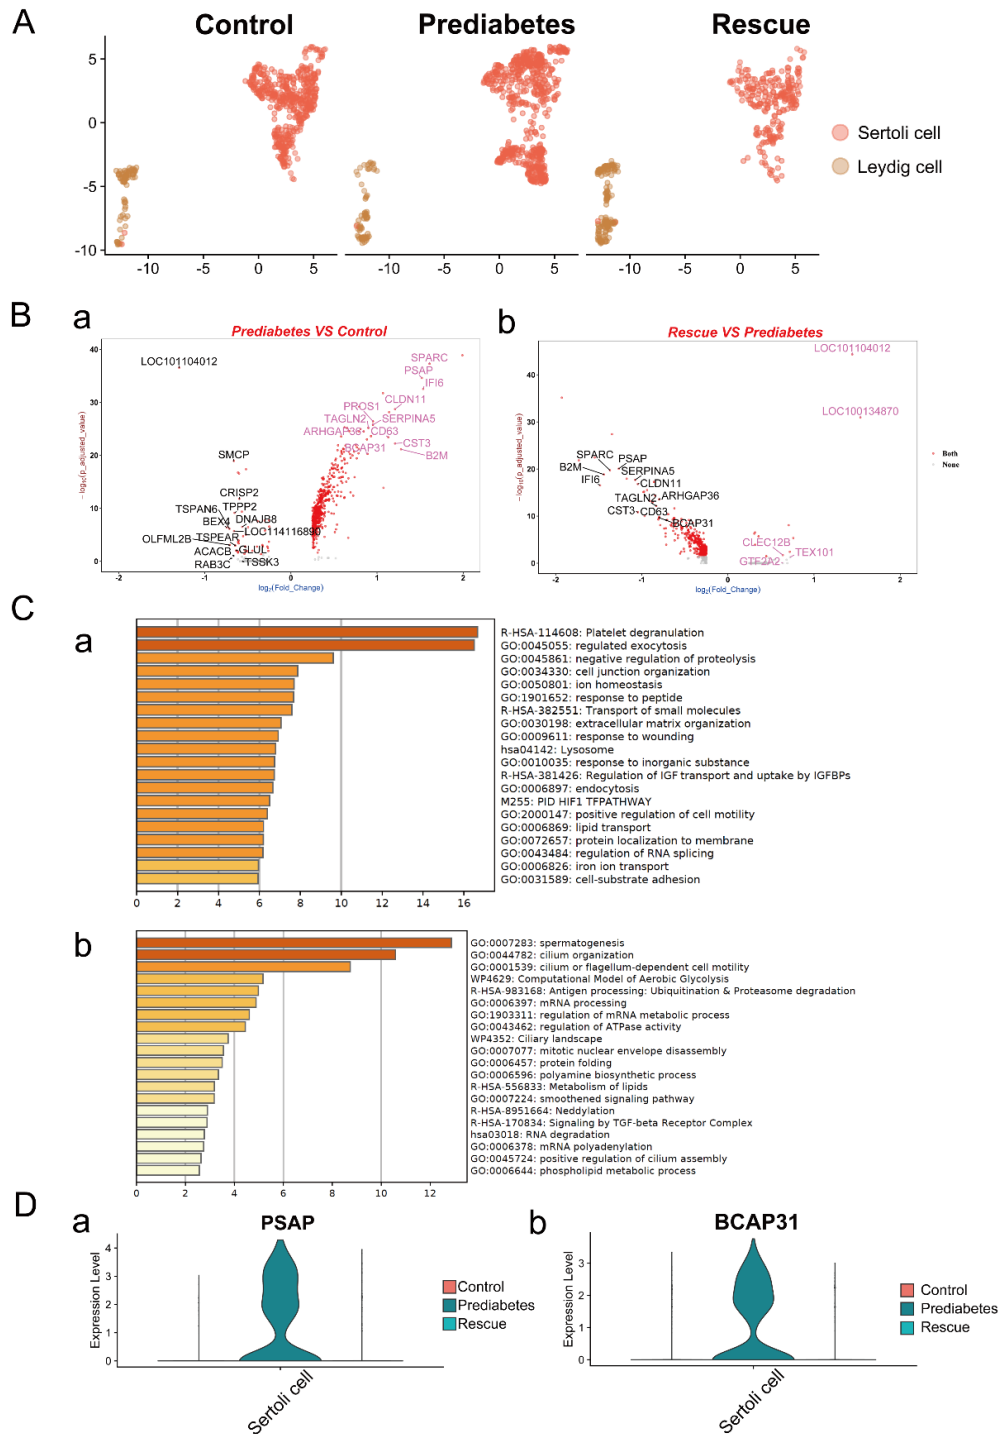

**Figure S5.** Transcript profile of Sertoli cells in the three groups. **A** UMAP plot of Sertoli cells in the three groups. **B** Volcano plot demonstrating DEGs in the prediabetes group vs. control, and rescue group vs. prediabetes group. **C** GO terms of up-regulated (a) and down-regulated (b) genes in the prediabetes vs. control groups. **D** Vlnplots of (a) *Psap* and (b) *Bcap31* in the three groups.

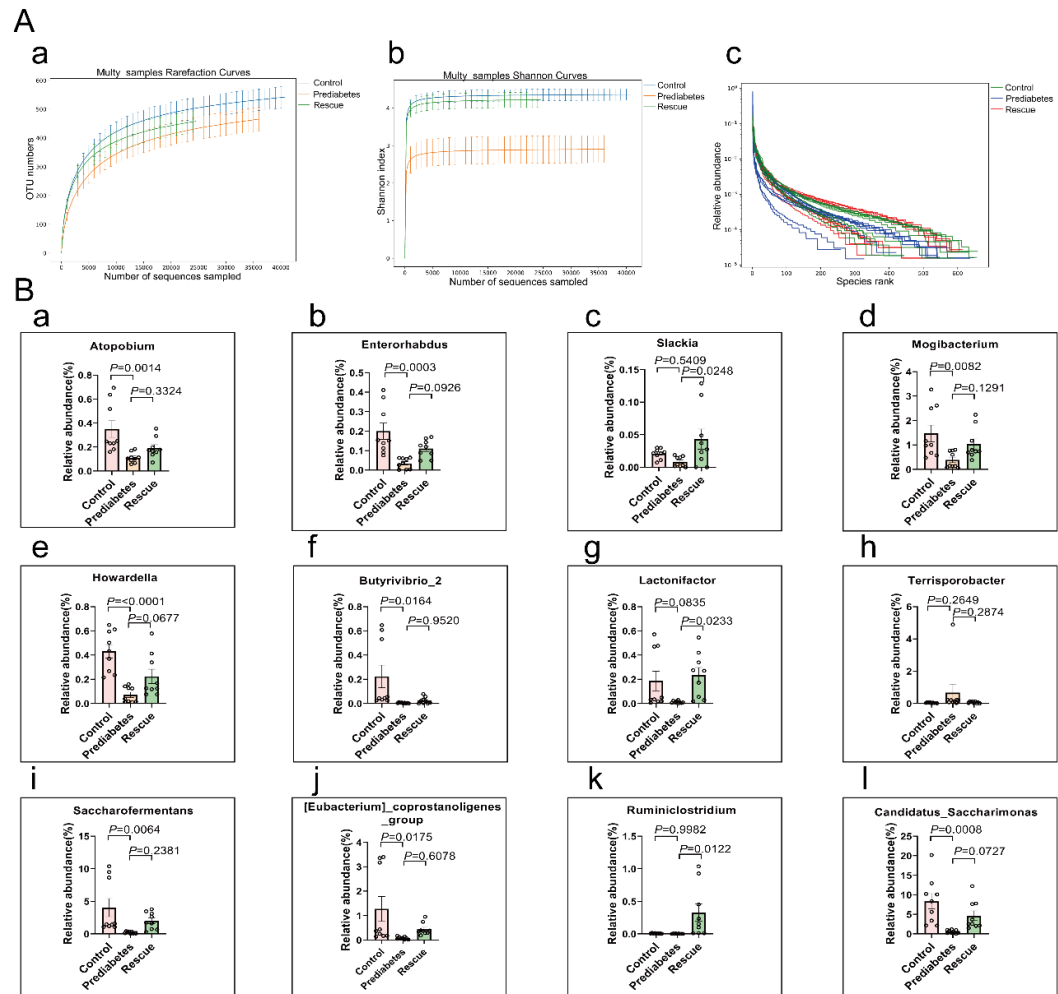

**Figure S6.**  $\alpha$ -diversity of gut microbiota and the abundance of genus-level gut microbiota in the three groups. **A** (a) OTU rank curves, (b) Shannon curves, and (c) rarefaction curves of gut microbiota for samples of the three groups. **B** Comparison of the relative abundance of genus level bacteria (a) *Atopobium*, (b) *Enterorhabdus*, (c) *Slackia*, (d) *Mogibacterium*, (e) *Howardella*, (f) *Butyrivibrio\_2*, (g) *Lactonifactor*, (h) *Terrisporobacter*, (i) *Saccharofermentans*, (j) *[Eubacterium]\_coprostanoligenes\_group*, (k) *Ruminiclostridium*, and (l) *Candidatus\_Saccharimonas* in the three groups ( $n=9$ ).

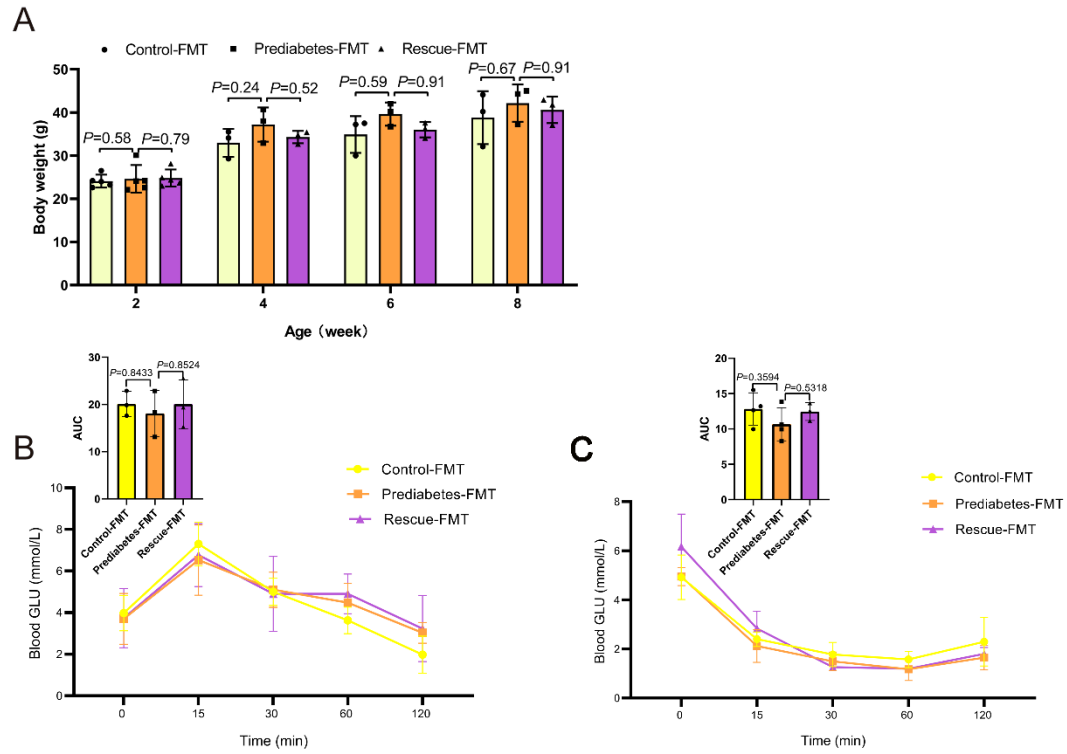

**Figure S7.** Physiological indicators in FMT mice. **A** Body weight in the three FMT groups with age ( $n=3$ ). **B** Glucose tolerance test ( $n=3$ ). **C** Insulin tolerance test ( $n=3$ ).

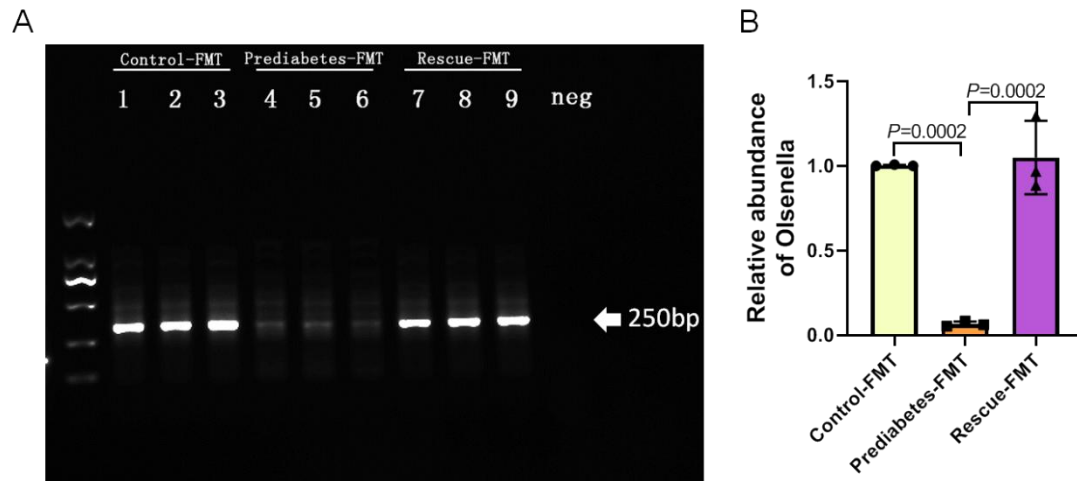

**Figure S8.** Comparison of the relative abundance of *Olsenella*. **A** The PCR analysis of *Olsenella* abundance in Control-FMT, Prediabetes-FMT and Rescue-FMT groups ( $n=3$ ). **B** The Q-PCR analysis of *Olsenella* abundance in the three FMT groups ( $n=3$ ).

**Supplementary table 1** The percentage of feedstuff composition

| Composition / Group | Control | Prediabetes | Rescue |
|---------------------|---------|-------------|--------|
| Corn                | 8.29%   | 25.31%      | 25.31% |
| Soybean meal        | 8.47%   | 25.85%      | 25.85% |
| Premix              | 0.88%   | 0.88%       | 0.88%  |
| Alfalfa             | 10.29%  | 5.77%       | 5.77%  |
| Ensilaged straw     | 72.07%  | 42.19%      | 42.19% |

Supplementary material

The original full-length blots from which the cropped images are derived

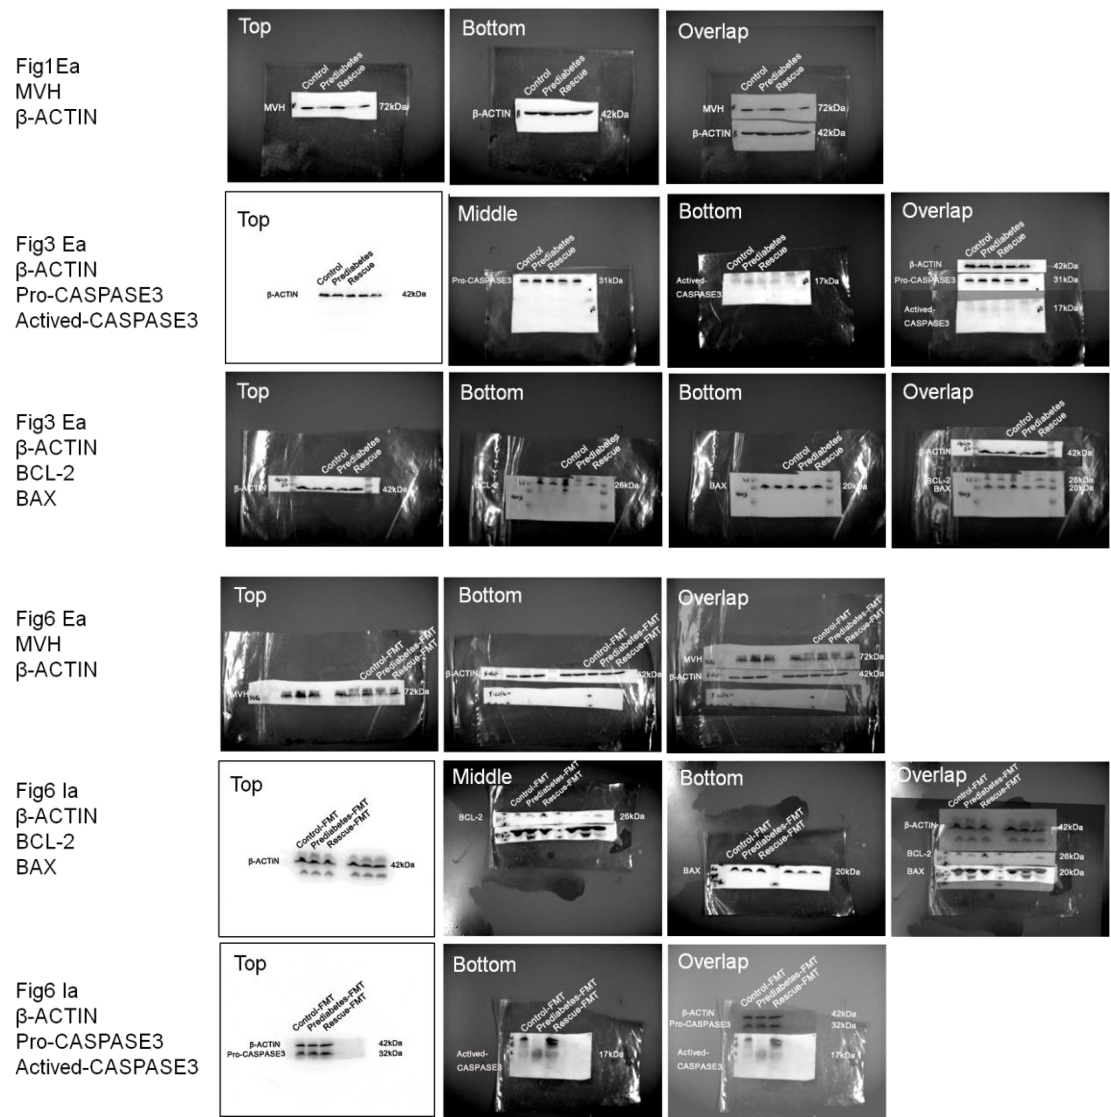

Supplement: Supplementary file 1 — Additional file 1. [file 12915_2022_1326_MOESM1_ESM.pdf]
